# Supplementary material for: Cultural engagement predicts changes in cognitive function in older adults over a 10 year period: findings from the English Longitudinal Study of Ageing
Source: Springer Nature journal article supplement (doi:10.1038/s41598-018-28591-8), 2018-06-29
Supplement: MOESM1 [file 41598_2018_28591_MOESM1_ESM.pdf]

## Supplementary Tables

### Cultural engagement predicts changes in cognitive function in older adults over a 10 year period: findings from the English Longitudinal Study of Ageing

Daisy Fancourt PhD and Andrew Steptoe DPhil DSc

**Table S1-A: Regression coefficients showing the effect of cultural engagement on cognition: model 1**

|                       | Memory             |      |       |           | Semantic fluency   |      |       |           |
|-----------------------|--------------------|------|-------|-----------|--------------------|------|-------|-----------|
|                       | $\beta \pm SE$     | t    | p     | CI        | $\beta \pm SE$     | t    | p     | CI        |
| Gallery/museum        |                    |      |       |           |                    |      |       |           |
| Less than once a year | <b>0.83 ± 0.15</b> | 5.61 | <.001 | 0.54-1.13 | <b>1.17 ± 0.28</b> | 4.16 | <.001 | 0.62-1.73 |
| Once or twice a year  | <b>1.27 ± 0.16</b> | 8.03 | <.001 | 0.96-1.58 | <b>2.02 ± 0.30</b> | 6.78 | <.001 | 1.44-2.61 |
| Every few months      | <b>1.63 ± 0.18</b> | 9.24 | <.001 | 1.28-1.98 | <b>3.06 ± 0.34</b> | 8.89 | <.001 | 2.38-3.73 |
| Monthly or more       | <b>1.65 ± 0.27</b> | 6.18 | <.001 | 1.12-2.27 | <b>2.23 ± 0.51</b> | 4.53 | <.001 | 1.32-3.33 |
| Theatre/concert/opera |                    |      |       |           |                    |      |       |           |
| Less than once a year | <b>1.07 ± 0.16</b> | 6.48 | <.001 | 0.74-1.39 | <b>1.51 ± 0.31</b> | 4.86 | <.001 | 0.90-2.11 |
| Once or twice a year  | <b>0.96 ± 0.16</b> | 6.07 | <.001 | 0.65-1.27 | <b>1.71 ± 0.30</b> | 5.66 | <.001 | 1.12-2.31 |
| Every few months      | <b>1.56 ± 0.17</b> | 9.26 | <.001 | 1.23-1.89 | <b>2.49 ± 0.32</b> | 7.82 | <.001 | 1.87-3.11 |
| Monthly or more       | <b>1.86 ± 0.24</b> | 7.89 | <.001 | 1.40-2.33 | <b>2.82 ± 0.43</b> | 6.52 | <.001 | 1.97-3.67 |
| Cinema                |                    |      |       |           |                    |      |       |           |
| Less than once a year | <b>0.81 ± 0.15</b> | 5.35 | <.001 | 0.51-1.11 | <b>1.64 ± 0.30</b> | 5.46 | <.001 | 1.05-2.23 |
| Once or twice a year  | <b>1.16 ± 0.16</b> | 7.41 | <.001 | 0.86-1.47 | <b>2.07 ± 0.30</b> | 7.01 | <.001 | 1.49-2.65 |
| Every few months      | <b>1.72 ± 0.17</b> | 9.98 | <.001 | 1.38-2.06 | <b>2.47 ± 0.33</b> | 7.38 | <.001 | 1.81-3.13 |
| Monthly or more       | <b>1.45 ± 0.22</b> | 6.55 | <.001 | 1.02-1.88 | <b>1.80 ± 0.38</b> | 4.71 | <.001 | 1.05-2.55 |

REF: never. B=beta coefficient; SE=standard error; CI=confidence intervals. N=3,445. Model adjusted for baseline cognition.

**Table S1-B: Regression coefficients showing the effect of cultural engagement on cognition: model 2**

|                       | Memory             |      |       |            | Semantic fluency   |      |       |            |
|-----------------------|--------------------|------|-------|------------|--------------------|------|-------|------------|
|                       | $\beta \pm SE$     | t    | p     | CI         | $\beta \pm SE$     | t    | p     | CI         |
| Gallery/museum        |                    |      |       |            |                    |      |       |            |
| Less than once a year | <b>0.33 ± 0.14</b> | 2.35 | .019  | 0.06-0.60  | 0.43 ± 0.28        | 1.55 | .12   | -0.12-0.98 |
| Once or twice a year  | <b>0.71 ± 0.15</b> | 4.67 | <.001 | 0.41-1.00  | <b>1.30 ± 0.30</b> | 4.36 | <.001 | 0.72-1.89  |
| Every few months      | <b>0.86 ± 0.17</b> | 4.95 | <.001 | 0.52-1.21  | <b>2.06 ± 0.35</b> | 5.89 | <.001 | 1.37-2.74  |
| Monthly or more       | <b>0.96 ± 0.26</b> | 3.74 | <.001 | 0.45-1.46  | <b>1.51 ± 0.49</b> | 3.06 | .002  | 0.54-2.48  |
| Theatre/concert/opera |                    |      |       |            |                    |      |       |            |
| Less than once a year | <b>0.56 ± 0.16</b> | 3.59 | <.001 | 0.25-0.86  | <b>0.80 ± 0.31</b> | 2.59 | .010  | 0.19-1.41  |
| Once or twice a year  | <b>0.43 ± 0.15</b> | 2.80 | .005  | 0.13-0.73  | <b>1.02 ± 0.31</b> | 3.32 | .001  | 0.42-1.63  |
| Every few months      | <b>0.86 ± 0.17</b> | 5.17 | <.001 | 0.53-1.18  | <b>1.59 ± 0.33</b> | 4.88 | <.001 | 0.95-2.23  |
| Monthly or more       | <b>1.08 ± 0.23</b> | 4.65 | <.001 | 0.62-1.53  | <b>1.85 ± 0.44</b> | 4.17 | <.001 | 0.98-2.72  |
| Cinema                |                    |      |       |            |                    |      |       |            |
| Less than once a year | 0.26 ± 0.14        | 1.83 | .067  | -0.02-0.54 | <b>0.83 ± 0.30</b> | 2.78 | .005  | 0.25-1.42  |
| Once or twice a year  | <b>0.34 ± 0.15</b> | 2.23 | .026  | 0.04-0.63  | <b>0.93 ± 0.30</b> | 3.10 | .002  | 0.34-1.51  |
| Every few months      | <b>0.75 ± 0.17</b> | 4.50 | <.001 | 0.42-1.07  | <b>1.07 ± 0.34</b> | 3.11 | .002  | 0.39-1.74  |
| Monthly or more       | <b>0.46 ± 0.21</b> | 2.16 | .031  | 0.04-0.88  | 0.48 ± 0.39        | 1.25 | .21   | -0.27-1.24 |

REF: never. B=beta coefficient; SE=standard error; CI=confidence intervals. N=3,445. Model adjusted for baseline cognition, sex, age, marital status, ethnicity, educational attainment, employment status, occupational classification and wealth.

**Table S1-C: Regression coefficients showing the effect of cultural engagement on cognition: model 3**

|                       | Memory             |             |                 |                   | Semantic fluency   |             |                 |                  |
|-----------------------|--------------------|-------------|-----------------|-------------------|--------------------|-------------|-----------------|------------------|
|                       | $\beta \pm SE$     | t           | p               | CI                | $\beta \pm SE$     | t           | p               | CI               |
| Gallery/museum        |                    |             |                 |                   |                    |             |                 |                  |
| Less than once a year | 0.25 ± 0.14        | 1.81        | .07             | -0.02-0.53        | 0.35 ± 0.28        | 1.23        | .22             | -0.21-0.90       |
| Once or twice a year  | <b>0.60 ± 0.15</b> | <b>3.93</b> | <b>&lt;.001</b> | <b>0.30-0.90</b>  | <b>1.13 ± 0.30</b> | <b>3.74</b> | <b>&lt;.001</b> | <b>0.54-1.72</b> |
| Every few months      | <b>0.77 ± 0.18</b> | <b>4.41</b> | <b>&lt;.001</b> | <b>0.43-1.12</b>  | <b>1.91 ± 0.35</b> | <b>5.37</b> | <b>&lt;.001</b> | <b>1.21-2.60</b> |
| Monthly or more       | <b>0.85 ± 0.26</b> | <b>3.32</b> | <b>&lt;.001</b> | <b>0.35-1.36</b>  | <b>1.36 ± 0.50</b> | <b>2.74</b> | <b>.006</b>     | <b>0.39-2.33</b> |
| Theatre/concert/opera |                    |             |                 |                   |                    |             |                 |                  |
| Less than once a year | <b>0.47 ± 0.16</b> | <b>3.00</b> | <b>.003</b>     | <b>0.16-0.78</b>  | <b>0.67 ± 0.31</b> | <b>2.12</b> | <b>.034</b>     | <b>0.05-1.28</b> |
| Once or twice a year  | <b>0.33 ± 0.15</b> | <b>2.14</b> | <b>.032</b>     | <b>0.03-0.63</b>  | <b>0.88 ± 0.31</b> | <b>2.82</b> | <b>.005</b>     | <b>0.27-1.49</b> |
| Every few months      | <b>0.74 ± 0.17</b> | <b>4.47</b> | <b>&lt;.001</b> | <b>0.42-1.07</b>  | <b>1.41 ± 0.33</b> | <b>4.22</b> | <b>&lt;.001</b> | <b>0.75-2.06</b> |
| Monthly or more       | <b>0.94 ± 0.23</b> | <b>4.02</b> | <b>&lt;.001</b> | <b>0.48-1.40</b>  | <b>1.63 ± 0.45</b> | <b>3.59</b> | <b>&lt;.001</b> | <b>0.74-2.52</b> |
| Cinema                |                    |             |                 |                   |                    |             |                 |                  |
| Less than once a year | 0.21 ± 0.14        | 1.44        | .15             | -0.07-0.49        | <b>0.73 ± 0.30</b> | <b>2.43</b> | <b>.015</b>     | <b>0.14-1.32</b> |
| Once or twice a year  | <b>0.24 ± 0.15</b> | <b>1.60</b> | <b>.11</b>      | <b>-0.06-0.54</b> | <b>0.76 ± 0.30</b> | <b>2.52</b> | <b>.012</b>     | <b>0.17-1.36</b> |
| Every few months      | <b>0.67 ± 0.17</b> | <b>4.00</b> | <b>&lt;.001</b> | <b>0.34-0.99</b>  | <b>0.94 ± 0.35</b> | <b>2.72</b> | <b>.007</b>     | <b>0.26-1.62</b> |
| Monthly or more       | 0.35 ± 0.22        | 1.64        | .10             | -0.07-0.77        | 0.33 ± 0.39        | 0.85        | .39             | -0.43-1.09       |

REF: never. B=beta coefficient; SE=standard error; CI=confidence intervals. N=3,445. Model adjusted for baseline cognition, sex, age, marital status, ethnicity, educational attainment, employment status, occupational classification, wealth, self-reported health, eyesight, hearing and depression.

**Table S1-D: Regression coefficients showing the effect of cultural engagement on cognition: model 4**

|                       | Memory             |             |                 |                  | Semantic fluency   |             |                 |                  |
|-----------------------|--------------------|-------------|-----------------|------------------|--------------------|-------------|-----------------|------------------|
|                       | $\beta \pm SE$     | t           | p               | CI               | $\beta \pm SE$     | t           | p               | CI               |
| Gallery/museum        |                    |             |                 |                  |                    |             |                 |                  |
| Less than once a year | 0.19 ± 0.14        | 1.37        | .17             | -0.08-0.47       | 0.26 ± 0.29        | 0.90        | .37             | -0.31-0.82       |
| Once or twice a year  | <b>0.52 ± 0.15</b> | <b>3.37</b> | <b>.001</b>     | <b>0.22-0.82</b> | <b>1.02 ± 0.31</b> | <b>3.30</b> | <b>.001</b>     | <b>0.41-1.62</b> |
| Every few months      | <b>0.67 ± 0.18</b> | <b>3.72</b> | <b>&lt;.001</b> | <b>0.32-1.02</b> | <b>1.75 ± 0.36</b> | <b>4.83</b> | <b>&lt;.001</b> | <b>1.04-2.46</b> |
| Monthly or more       | <b>0.74 ± 0.26</b> | <b>2.86</b> | <b>.004</b>     | <b>0.23-1.25</b> | <b>1.20 ± 0.50</b> | <b>2.39</b> | <b>.017</b>     | <b>0.22-2.19</b> |
| Theatre/concert/opera |                    |             |                 |                  |                    |             |                 |                  |
| Less than once a year | <b>0.41 ± 0.16</b> | <b>2.62</b> | <b>.009</b>     | <b>0.10-0.72</b> | 0.58 ± 0.32        | 1.82        | .069            | -0.05-1.20       |
| Once or twice a year  | 0.24 ± 0.16        | 1.53        | .13             | -0.07-0.55       | <b>0.74 ± 0.32</b> | <b>2.33</b> | <b>.020</b>     | <b>0.12-1.37</b> |
| Every few months      | <b>0.63 ± 0.17</b> | <b>3.66</b> | <b>&lt;.001</b> | <b>0.29-0.97</b> | <b>1.23 ± 0.34</b> | <b>3.58</b> | <b>&lt;.001</b> | <b>0.56-1.91</b> |
| Monthly or more       | <b>0.80 ± 0.24</b> | <b>3.32</b> | <b>.001</b>     | <b>0.33-1.27</b> | <b>1.41 ± 0.47</b> | <b>3.03</b> | <b>.002</b>     | <b>0.50-2.32</b> |
| Cinema                |                    |             |                 |                  |                    |             |                 |                  |
| Less than once a year | 0.16 ± 0.14        | 1.11        | 0.27            | -0.12-0.44       | <b>0.66 ± 0.30</b> | <b>2.18</b> | <b>.030</b>     | <b>0.07-1.25</b> |
| Once or twice a year  | 0.17 ± 0.15        | 1.13        | 0.26            | -0.13-0.48       | <b>0.65 ± 0.31</b> | <b>2.10</b> | <b>.036</b>     | <b>0.04-1.25</b> |
| Every few months      | <b>0.56 ± 0.17</b> | <b>3.31</b> | <b>0.001</b>    | <b>0.23-0.89</b> | <b>0.76 ± 0.35</b> | <b>2.14</b> | <b>.032</b>     | <b>0.06-1.45</b> |
| Monthly or more       | 0.25 ± 0.22        | 1.13        | 0.26            | -0.18-0.67       | 0.14 ± 0.39        | 0.36        | .72             | -0.63-0.91       |

REF: never. B=beta coefficient; SE=standard error; CI=confidence intervals. N=3,445. Model adjusted for baseline cognition, sex, age, marital status, ethnicity, educational attainment, employment status, occupational classification, wealth, self-reported health, eyesight, hearing, depression, social network, civic engagement, whether participants had a hobby, whether participants used the internet and whether participants read a daily newspaper.

**Table S2: Regression coefficients showing baseline associations between cultural engagement and cognition**

|                       | Memory             |             |                 |                  | Semantic fluency   |             |                 |                  |
|-----------------------|--------------------|-------------|-----------------|------------------|--------------------|-------------|-----------------|------------------|
|                       | $\beta \pm SE$     | t           | p               | CI               | $\beta \pm SE$     | t           | p               | CI               |
| Gallery/museum        |                    |             |                 |                  |                    |             |                 |                  |
| Less than once a year | <b>0.36 ± 0.13</b> | <b>2.77</b> | <b>.006</b>     | <b>0.11-0.62</b> | 0.43 ± 0.27        | 1.59        | .11             | -0.10-0.96       |
| Once or twice a year  | <b>0.40 ± 0.14</b> | <b>2.78</b> | <b>.005</b>     | <b>0.12-0.69</b> | <b>0.77 ± 0.30</b> | <b>2.59</b> | <b>.010</b>     | <b>0.19-1.36</b> |
| Every few months      | <b>0.96 ± 0.17</b> | <b>5.60</b> | <b>&lt;.001</b> | <b>0.62-1.29</b> | <b>1.48 ± 0.35</b> | <b>4.20</b> | <b>&lt;.001</b> | <b>0.79-2.17</b> |
| Monthly or more       | <b>0.81 ± 0.24</b> | <b>3.39</b> | <b>.001</b>     | <b>0.34-1.28</b> | <b>1.81 ± 0.49</b> | <b>3.67</b> | <b>&lt;.001</b> | <b>0.85-2.78</b> |
| Theatre/concert/opera |                    |             |                 |                  |                    |             |                 |                  |
| Less than once a year | <b>0.46 ± 0.15</b> | <b>3.15</b> | <b>.002</b>     | <b>0.17-0.75</b> | 0.23 ± 0.30        | 0.75        | .45             | -0.36-0.81       |
| Once or twice a year  | <b>0.35 ± 0.15</b> | <b>2.38</b> | <b>.017</b>     | <b>0.06-0.63</b> | -0.09 ± 0.30       | -0.31       | .76             | -0.68-0.50       |
| Every few months      | <b>0.47 ± 0.16</b> | <b>2.91</b> | <b>.004</b>     | <b>0.15-0.79</b> | 0.13 ± 0.33        | 0.38        | .71             | -0.53-0.78       |
| Monthly or more       | <b>0.53 ± 0.21</b> | <b>2.46</b> | <b>.014</b>     | <b>0.11-0.95</b> | 0.31 ± 0.44        | 0.70        | .49             | -0.56-1.17       |
| Cinema                |                    |             |                 |                  |                    |             |                 |                  |
| Less than once a year | 0.25 ± 0.13        | 1.92        | .055            | -0.01-0.51       | 0.21 ± 0.27        | 0.75        | .45             | -0.33-0.74       |
| Once or twice a year  | 0.14 ± 0.15        | 0.96        | .34             | -0.15-0.43       | 0.28 ± 0.30        | 0.92        | .36             | -0.31-0.87       |
| Every few months      | <b>0.55 ± 0.16</b> | <b>3.54</b> | <b>&lt;.001</b> | <b>0.25-0.86</b> | <b>0.78 ± 0.32</b> | <b>2.42</b> | <b>.015</b>     | <b>0.15-1.41</b> |
| Monthly or more       | 0.05 ± 0.20        | 0.28        | .78             | -0.33-0.44       | 0.42 ± 0.40        | 1.04        | .30             | -0.37-1.22       |

REF: never. B=beta coefficient; SE=standard error; CI=confidence intervals. N=3,445. Model adjusted for sex, age, marital status, ethnicity, educational attainment, employment status, occupational classification, wealth, self-reported health, eyesight, hearing, depression, social network, civic engagement, whether participants had a hobby, whether participants used the internet and whether participants read a daily newspaper.

**Table S3-A: Regression coefficients showing the effect of cultural engagement on cognition: lower cognitive function**

|                       | Memory             |             |                 |                  | Semantic fluency   |             |             |                  |
|-----------------------|--------------------|-------------|-----------------|------------------|--------------------|-------------|-------------|------------------|
|                       | $\beta \pm SE$     | t           | p               | CI               | $\beta \pm SE$     | t           | p           | CI               |
| Gallery/museum        |                    |             |                 |                  |                    |             |             |                  |
| Less than once a year | 0.21 ± 0.18        | 1.12        | .26             | -0.15-0.57       | 0.16 ± 0.35        | 0.45        | .65         | 0.53-0.85        |
| Once or twice a year  | <b>0.45 ± 0.21</b> | <b>2.19</b> | <b>.029</b>     | <b>0.05-0.86</b> | <b>0.82 ± 0.39</b> | <b>2.08</b> | <b>.037</b> | 0.05-1.59        |
| Every few months      | <b>0.68 ± 0.27</b> | <b>2.54</b> | <b>.011</b>     | <b>0.15-1.20</b> | <b>1.16 ± 0.50</b> | <b>2.33</b> | <b>.020</b> | 0.18-2.14        |
| Monthly or more       | 0.64 ± 0.37        | 1.75        | .080            | -0.08-1.37       | 0.71 ± 0.77        | 0.92        | 0.36        | -0.80-2.21       |
| Theatre/concert/opera |                    |             |                 |                  |                    |             |             |                  |
| Less than once a year | <b>0.65 ± 0.20</b> | <b>3.18</b> | <b>.001</b>     | <b>0.25-1.05</b> | 0.55 ± 0.40        | 1.39        | 0.17        | -0.23-1.32       |
| Once or twice a year  | 0.15 ± 0.20        | 0.74        | .46             | -0.25-0.55       | <b>0.87 ± 0.40</b> | <b>2.21</b> | <b>.027</b> | <b>0.10-1.65</b> |
| Every few months      | <b>0.88 ± 0.24</b> | <b>3.68</b> | <b>&lt;.001</b> | <b>0.41-1.34</b> | 0.82 ± 0.45        | 1.80        | .072        | -0.07-1.71       |
| Monthly or more       | <b>0.84 ± 0.32</b> | <b>2.64</b> | <b>.008</b>     | <b>0.21-1.46</b> | 1.14 ± 0.63        | 1.79        | .073        | -0.11-2.38       |
| Cinema                |                    |             |                 |                  |                    |             |             |                  |
| Less than once a year | 0.06 ± 0.19        | 0.31        | .76             | -0.31-0.43       | 0.46 ± 0.36        | 1.30        | .19         | -0.24-1.16       |
| Once or twice a year  | 0.14 ± 0.21        | 0.65        | .51             | -0.28-0.55       | 0.66 ± 0.41        | 1.63        | .10         | -0.13-1.46       |
| Every few months      | <b>0.53 ± 0.24</b> | <b>2.21</b> | <b>.028</b>     | <b>0.06-1.00</b> | 0.35 ± 0.45        | 0.77        | .44         | -0.54-1.23       |
| Monthly or more       | 0.38 ± 0.29        | 1.30        | .19             | -0.19-0.94       | -0.20-0.58         | -0.33       | .74         | -1.34-0.95       |

REF: never. B=beta coefficient; SE=standard error; CI=confidence intervals. Memory: n=1,854. Semantic fluency: n=1,752. Model adjusted for baseline cognition, sex, age, marital status, ethnicity, educational attainment, employment status, occupational classification, wealth, self-reported health, eyesight, hearing, depression, social network, civic engagement, whether participants had a hobby, whether participants used the internet and whether participants read a daily newspaper.

**Table S3-B: Regression coefficients showing the effect of cultural engagement on cognition: higher cognitive function**

|                       | Memory             |             |             |                  | Semantic fluency   |             |                 |                  |
|-----------------------|--------------------|-------------|-------------|------------------|--------------------|-------------|-----------------|------------------|
|                       | $\beta \pm SE$     | t           | p           | CI               | $\beta \pm SE$     | t           | p               | CI               |
| Gallery/museum        |                    |             |             |                  |                    |             |                 |                  |
| Less than once a year | 0.30 ± 0.22        | 1.39        | .16         | -0.12-0.73       | 0.59 ± 0.45        | 1.29        | 0.20            | -0.30-1.48       |
| Once or twice a year  | <b>0.70 ± 0.23</b> | <b>3.00</b> | <b>.003</b> | <b>0.24-1.16</b> | <b>1.42 ± 0.49</b> | <b>2.92</b> | <b>.004</b>     | <b>0.47-2.38</b> |
| Every few months      | <b>0.74 ± 0.26</b> | <b>2.88</b> | <b>.004</b> | <b>0.24-1.25</b> | <b>2.13 ± 0.54</b> | <b>3.92</b> | <b>&lt;.001</b> | <b>1.07-3.20</b> |
| Monthly or more       | <b>0.98 ± 0.36</b> | <b>2.73</b> | <b>.006</b> | <b>0.28-1.68</b> | 1.36 ± 0.72        | 1.89        | .059            | -0.49-2.76       |
| Theatre/concert/opera |                    |             |             |                  |                    |             |                 |                  |
| Less than once a year | 0.23 ± 0.24        | 0.96        | .34         | -0.24-0.70       | 0.51 ± 0.49        | 1.05        | .30             | -0.45-1.47       |
| Once or twice a year  | 0.39 ± 0.24        | 1.64        | .10         | -0.08-0.87       | 0.52 ± 0.49        | 1.06        | .29             | -0.44-1.49       |
| Every few months      | 0.45 ± 0.26        | 1.77        | .077        | 0.05-0.95        | <b>1.43 ± 0.53</b> | <b>2.70</b> | <b>.007</b>     | <b>0.39-2.46</b> |
| Monthly or more       | <b>0.82 ± 0.33</b> | <b>2.46</b> | <b>.014</b> | <b>0.17-1.47</b> | <b>1.34 ± 0.66</b> | <b>2.01</b> | <b>.044</b>     | <b>0.03-2.64</b> |
| Cinema                |                    |             |             |                  |                    |             |                 |                  |
| Less than once a year | 0.25 ± 0.22        | 1.14        | .25         | -0.18-0.67       | 0.82 ± 0.44        | 1.85        | .065            | -0.05-1.69       |
| Once or twice a year  | 0.19 ± 0.23        | 0.83        | .41         | -0.26-0.65       | 0.63 ± 0.48        | 1.32        | .19             | -0.31-1.57       |
| Every few months      | <b>0.64 ± 0.24</b> | <b>2.73</b> | <b>.006</b> | <b>0.18-1.10</b> | <b>1.06 ± 0.50</b> | <b>2.13</b> | <b>.034</b>     | <b>0.08-2.03</b> |
| Monthly or more       | 0.21-0.31          | 0.69        | .49         | -0.39-0.81       | 0.50 ± 0.61        | 0.82        | .41             | -0.69-1.69       |

REF: never. B=beta coefficient; SE=standard error; CI=confidence intervals. Memory: n=1,591. Semantic fluency: n=1,693. Model adjusted for baseline cognition, sex, age, marital status, ethnicity, educational attainment, employment status, occupational classification, wealth, self-reported health, eyesight, hearing, depression, social network, civic engagement, whether participants had a hobby, whether participants used the internet and whether participants read a daily newspaper.

**Table S4-A: Regression coefficients showing the effect of cultural engagement on cognition: excluding those with mobility issues**

|                       | Memory             |             |                 |                  | Semantic fluency   |             |                 |                  |
|-----------------------|--------------------|-------------|-----------------|------------------|--------------------|-------------|-----------------|------------------|
|                       | $\beta \pm SE$     | t           | p               | CI               | $\beta \pm SE$     | t           | p               | CI               |
| Gallery/museum        |                    |             |                 |                  |                    |             |                 |                  |
| Less than once a year | 0.29 ± 0.15        | 1.90        | .058            | -0.01-0.59       | 0.23 ± 0.31        | 0.74        | 0.46            | -0.38-0.83       |
| Once or twice a year  | <b>0.62 ± 0.17</b> | <b>3.71</b> | <b>&lt;.001</b> | <b>0.29-0.94</b> | <b>1.04 ± 0.34</b> | <b>3.09</b> | <b>.002</b>     | <b>0.38-1.69</b> |
| Every few months      | <b>0.73 ± 0.20</b> | <b>3.73</b> | <b>&lt;.001</b> | <b>0.35-1.11</b> | <b>1.72 ± 0.39</b> | <b>4.36</b> | <b>&lt;.001</b> | <b>0.94-2.49</b> |
| Monthly or more       | <b>0.88 ± 0.27</b> | <b>3.27</b> | <b>.001</b>     | <b>0.35-1.41</b> | <b>1.14 ± 0.55</b> | <b>2.09</b> | <b>.037</b>     | <b>0.07-2.21</b> |
| Theatre/concert/opera |                    |             |                 |                  |                    |             |                 |                  |
| Less than once a year | <b>0.47 ± 0.17</b> | <b>2.75</b> | <b>.006</b>     | <b>0.13-0.80</b> | <b>0.78 ± 0.34</b> | <b>2.28</b> | <b>.023</b>     | <b>0.11-1.46</b> |
| Once or twice a year  | <b>0.37 ± 0.17</b> | <b>2.18</b> | <b>.029</b>     | <b>0.04-0.70</b> | <b>0.82 ± 0.34</b> | <b>2.40</b> | <b>.016</b>     | <b>0.15-1.49</b> |
| Every few months      | <b>0.82 ± 0.19</b> | <b>4.42</b> | <b>&lt;.001</b> | <b>0.46-1.18</b> | <b>1.37 ± 0.38</b> | <b>3.66</b> | <b>&lt;.001</b> | <b>0.64-2.11</b> |
| Monthly or more       | <b>0.91 ± 0.24</b> | <b>3.83</b> | <b>&lt;.001</b> | <b>0.45-1.38</b> | <b>1.44 ± 0.48</b> | <b>3.00</b> | <b>.003</b>     | <b>0.50-2.39</b> |
| Cinema                |                    |             |                 |                  |                    |             |                 |                  |
| Less than once a year | 0.14 ± 0.15        | 0.92        | .36             | -0.16-0.44       | <b>0.66 ± 0.31</b> | <b>2.14</b> | <b>.033</b>     | <b>0.06-1.27</b> |
| Once or twice a year  | 0.32 ± 0.17        | 1.93        | .054            | 0.01-0.65        | <b>0.83 ± 0.34</b> | <b>2.46</b> | <b>.014</b>     | <b>0.17-1.49</b> |
| Every few months      | <b>0.64 ± 0.18</b> | <b>3.63</b> | <b>&lt;.001</b> | <b>0.30-0.99</b> | <b>0.92 ± 0.36</b> | <b>2.57</b> | <b>.010</b>     | <b>0.22-1.62</b> |
| Monthly or more       | 0.33 ± 0.22        | 1.53        | .13             | -0.09-0.76       | 0.30 ± 0.44        | 0.69        | .49             | -0.56-1.17       |

REF: never. B=beta coefficient; SE=standard error; CI=confidence intervals. N=2,908. Model adjusted for baseline cognition, sex, age, marital status, ethnicity, educational attainment, employment status, occupational classification, wealth, self-reported health, eyesight, hearing, depression, social network, civic engagement, whether participants had a hobby, whether participants used the internet and whether participants read a daily newspaper.

**Table S5-A: Regression coefficients showing the effect of cultural engagement on cognition: excluding those with dementia diagnosis at baseline or in the 2 years following baseline**

|                       | Memory             |             |                 |                  | Semantic fluency   |             |                 |                    |
|-----------------------|--------------------|-------------|-----------------|------------------|--------------------|-------------|-----------------|--------------------|
|                       | $\beta \pm SE$     | t           | p               | CI               | $\beta \pm SE$     | t           | p               | CI                 |
| Gallery/museum        |                    |             |                 |                  |                    |             |                 |                    |
| Less than once a year | <b>0.29 ± 0.14</b> | <b>2.01</b> | <b>.045</b>     | <b>0.01-0.57</b> | 0.29 ± 0.28        | 1.01        | .31             | -0.27-0.85         |
| Once or twice a year  | <b>0.62 ± 0.16</b> | <b>3.92</b> | <b>&lt;.001</b> | <b>0.31-0.92</b> | <b>1.11 ± 0.31</b> | <b>3.55</b> | <b>&lt;.001</b> | <b>0.50-1.73</b>   |
| Every few months      | <b>0.73 ± 0.19</b> | <b>3.95</b> | <b>&lt;.001</b> | <b>0.37-1.10</b> | <b>1.70 ± 0.37</b> | <b>4.60</b> | <b>&lt;.001</b> | <b>0.98-2.43</b>   |
| Monthly or more       | <b>0.88 ± 0.26</b> | <b>3.42</b> | <b>.001</b>     | <b>0.38-1.39</b> | <b>1.07 ± 0.51</b> | <b>2.07</b> | <b>.038</b>     | <b>0.06-2.08</b>   |
| Theatre/concert/opera |                    |             |                 |                  |                    |             |                 |                    |
| Less than once a year | <b>0.46 ± 0.16</b> | <b>2.90</b> | <b>.004</b>     | <b>0.15-0.76</b> | 0.52 ± 0.31        | 1.64        | .10             | -0.10-1.13         |
| Once or twice a year  | 0.28 ± 0.16        | 1.77        | .077            | -0.03-0.59       | <b>0.75 ± 0.31</b> | <b>2.39</b> | <b>.017</b>     | <b>0.13-1.37</b>   |
| Every few months      | <b>0.66 ± 0.18</b> | <b>3.77</b> | <b>&lt;.001</b> | <b>0.32-1.00</b> | <b>1.16 ± 0.35</b> | <b>3.31</b> | <b>.001</b>     | <b>0.47-1.84</b>   |
| Monthly or more       | <b>0.85 ± 0.23</b> | <b>3.70</b> | <b>&lt;.001</b> | <b>0.40-1.30</b> | <b>1.32 ± 0.46</b> | <b>2.87</b> | <b>.004</b>     | <b>0.42-2.22</b>   |
| Cinema                |                    |             |                 |                  |                    |             |                 |                    |
| Less than once a year | 0.14 ± 0.14        | 1.00        | .32             | -0.14-0.42       | <b>0.62 ± 0.29</b> | <b>2.19</b> | <b>.029</b>     | <b>0.06-1.18</b>   |
| Once or twice a year  | 0.15 ± 0.16        | 0.97        | .33             | -0.16-0.46       | <b>0.62 ± 0.31</b> | <b>1.96</b> | <b>.050</b>     | <b>0.0002-1.23</b> |
| Every few months      | <b>0.55 ± 0.17</b> | <b>3.28</b> | <b>.001</b>     | <b>0.22-0.88</b> | <b>0.69 ± 0.34</b> | <b>2.04</b> | <b>.041</b>     | <b>0.03-1.35</b>   |
| Monthly or more       | 0.32 ± 0.21        | 1.50        | .13             | -0.10-0.73       | 0.13 ± 0.42        | 0.30        | .76             | -0.70-0.96         |

REF: never. B=beta coefficient; SE=standard error; CI=confidence intervals. N=3,314. Model adjusted for baseline cognition, sex, age, marital status, ethnicity, educational attainment, employment status, occupational classification, wealth, self-reported health, eyesight, hearing, depression, social network, civic engagement, whether participants had a hobby, whether participants used the internet and whether participants read a daily newspaper.
